# Supplementary figures and images for: Suspected cancer (part 2--adults): reference tables from updated NICE guidance
Source: HighWire-hosted journal article supplement (doi:10.1136/bmj.h3044), 2015-06-23

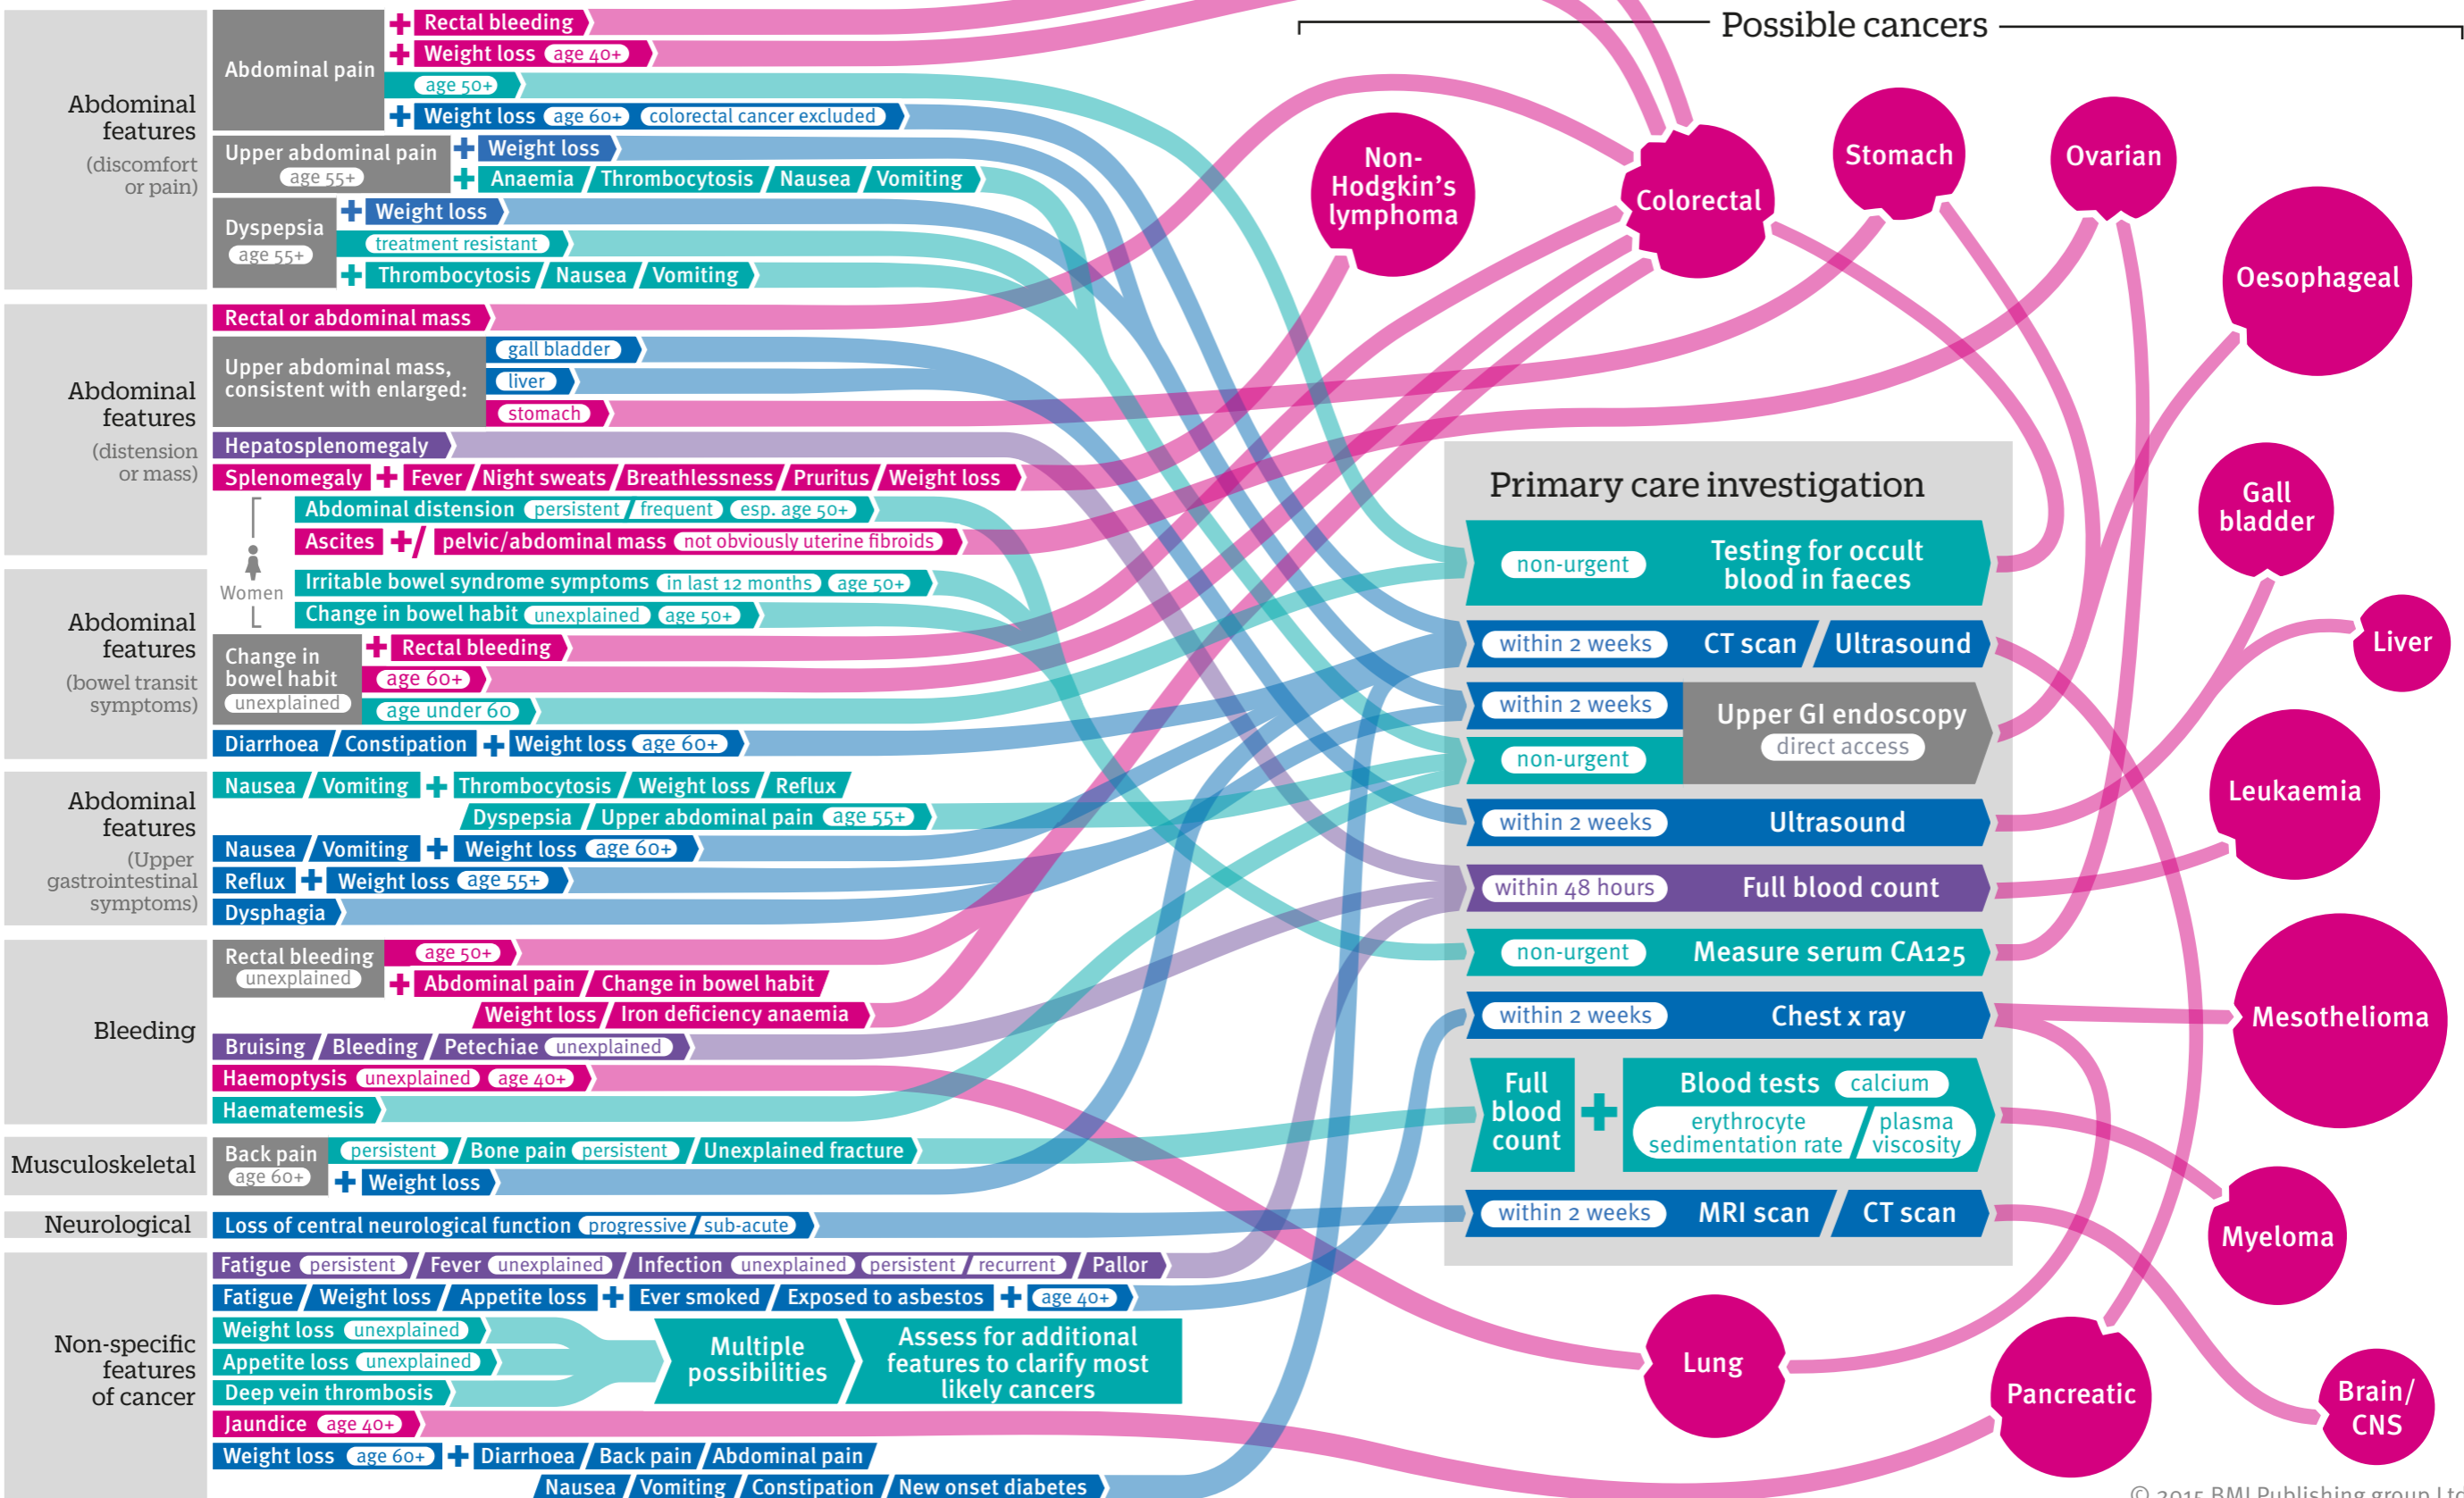

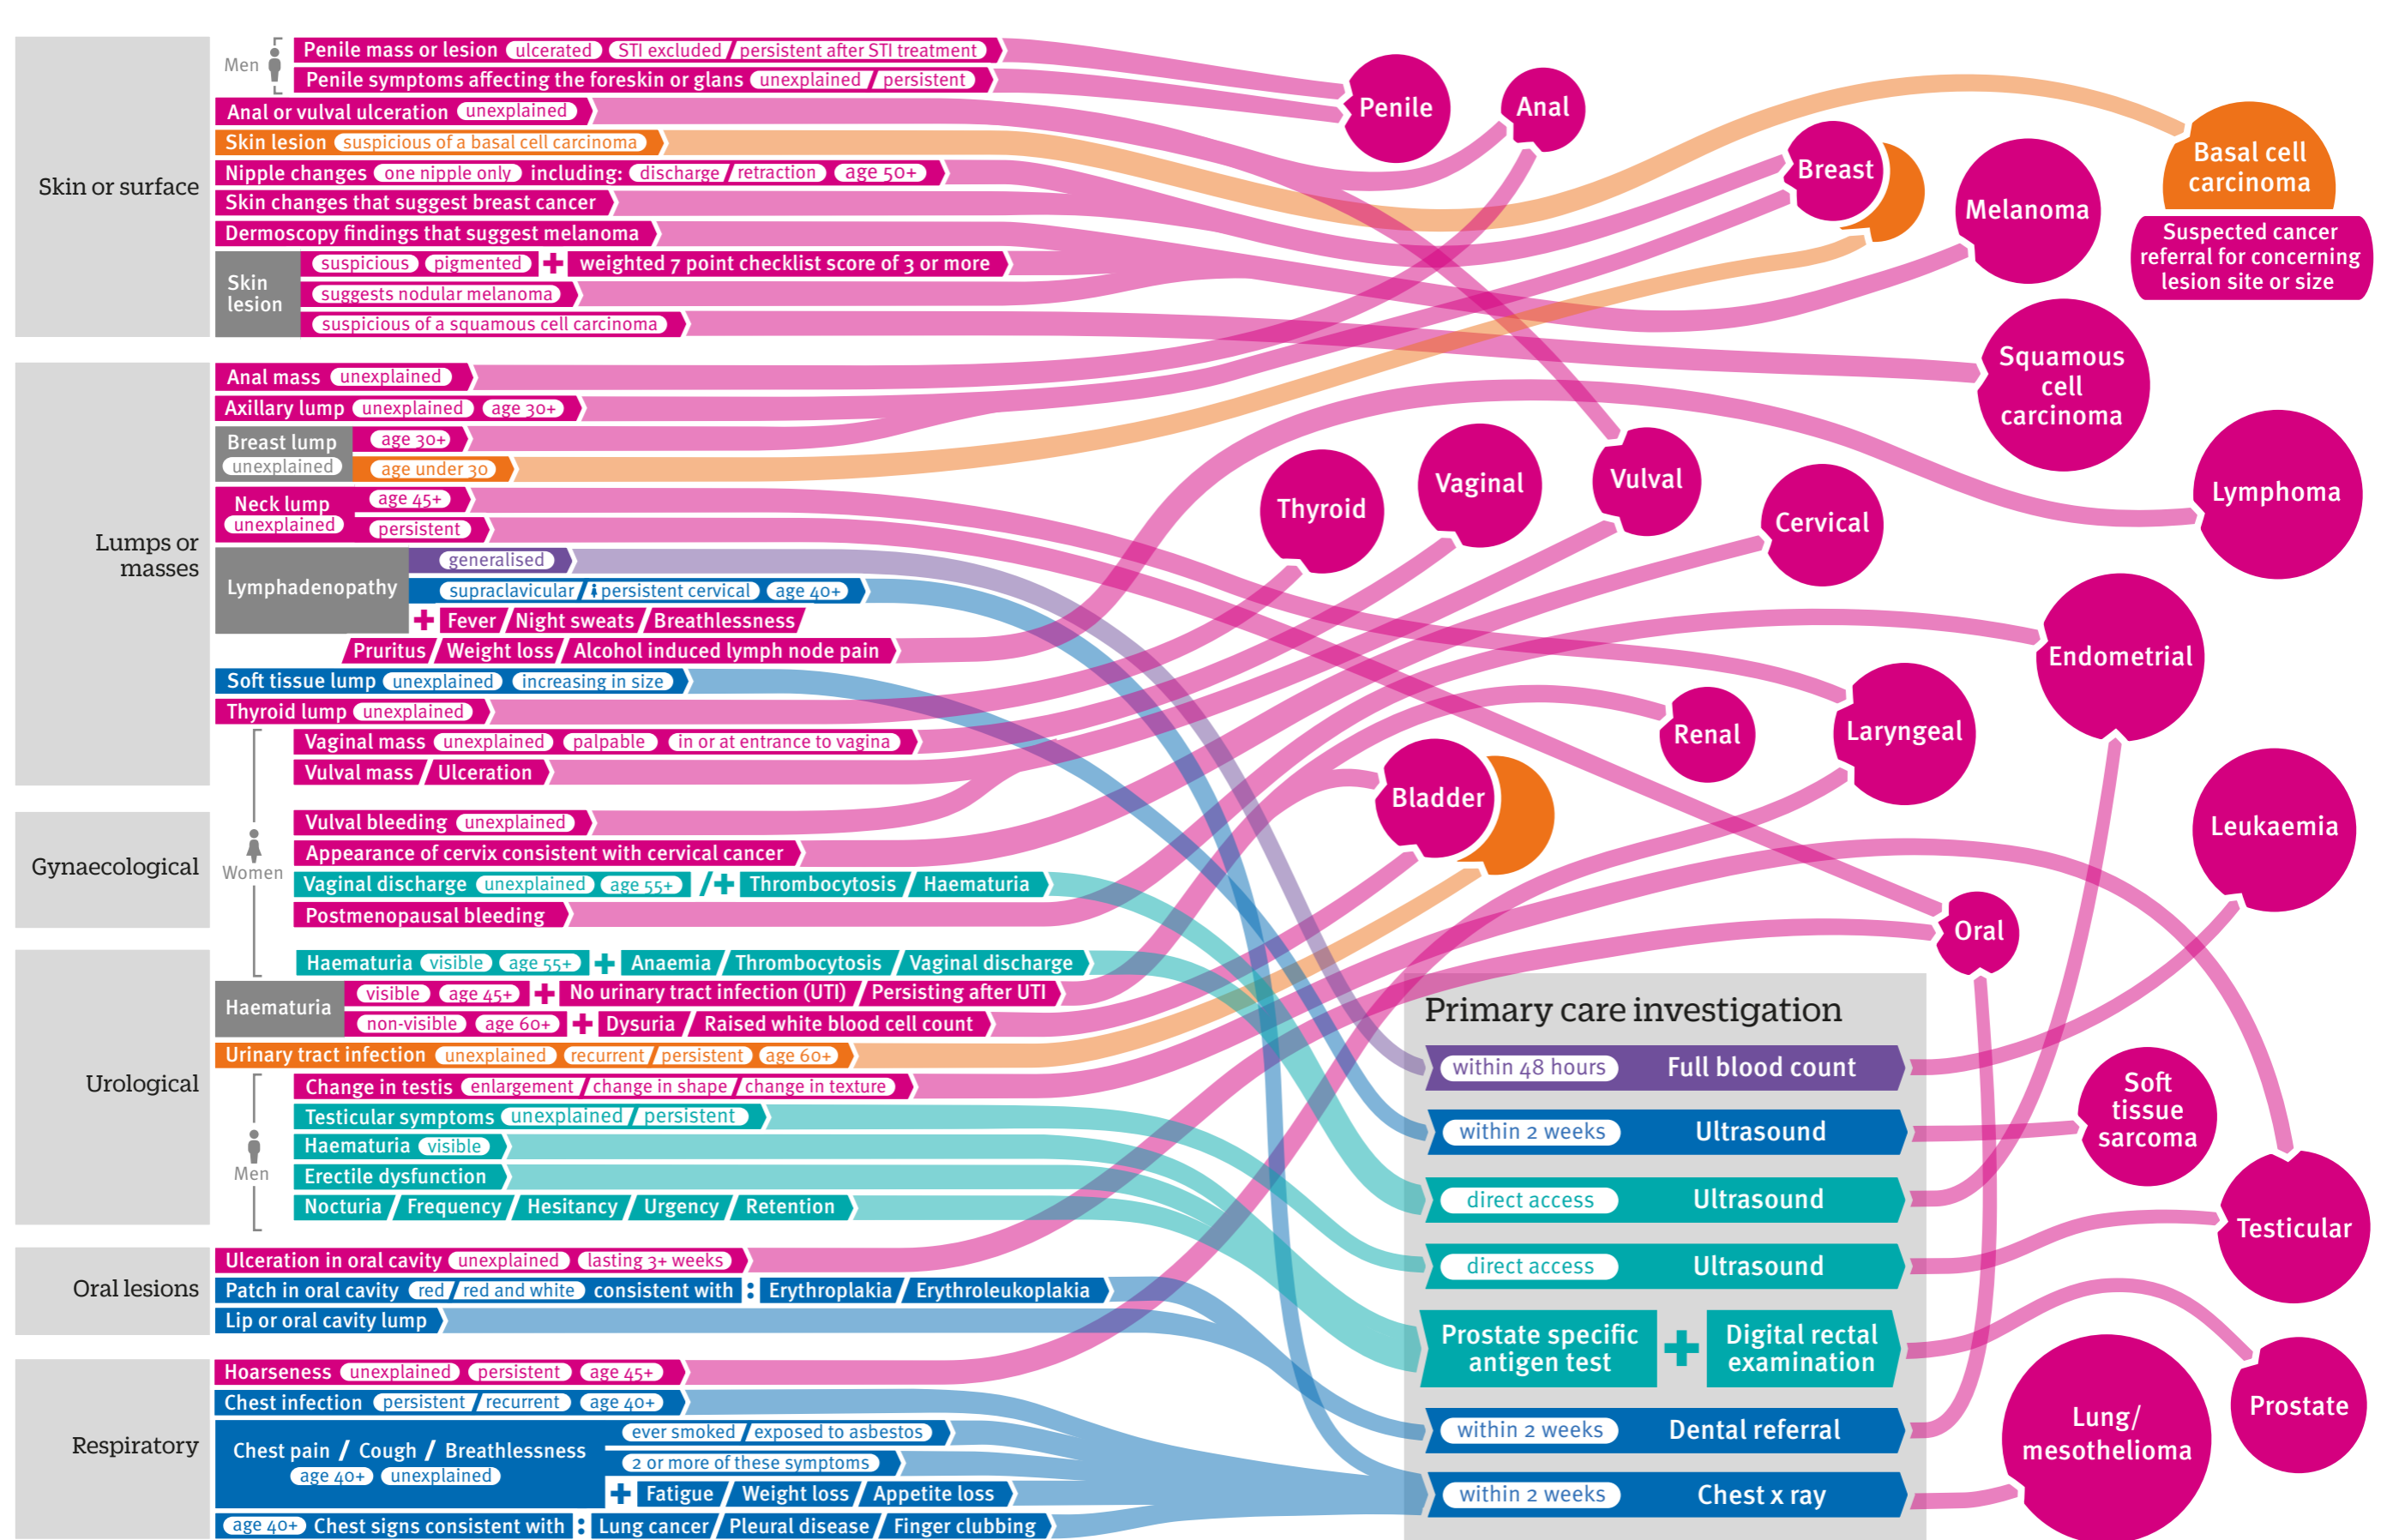

Supplement: adult_cancer_NICE_graphic_v3.1.pdf [file adult_cancer_NICE_graphic_v3.1.pdf]
